# Supplementary material for: Hierarchically mesoporous/macroporous structured TiO2 for dye-sensitized solar cells
Source: Royal Society of Chemistry journal article supplement (doi:10.1039/c5ra11938c), 2015-01-01
Supplement: c5ra11938c1.pdf [file c5ra11938c1.pdf]

## Supporting Information

### Hierarchically Mesoporous/macroporous Structured TiO<sub>2</sub> for Dye-Sensitized Solar Cells

Dianyu Qi,<sup>a</sup> Lingzhi Wang\*<sup>a</sup> and Jinlong Zhang\*<sup>a,b</sup>

a. Key Laboratory for Advanced Materials and Institute of Fine Chemicals, East China University of Science and Technology, 130 Meilong Road, Shanghai 200237, P. R. China.

b. Department of Chemistry, Tsinghua University, Beijing 100084, P. R. China

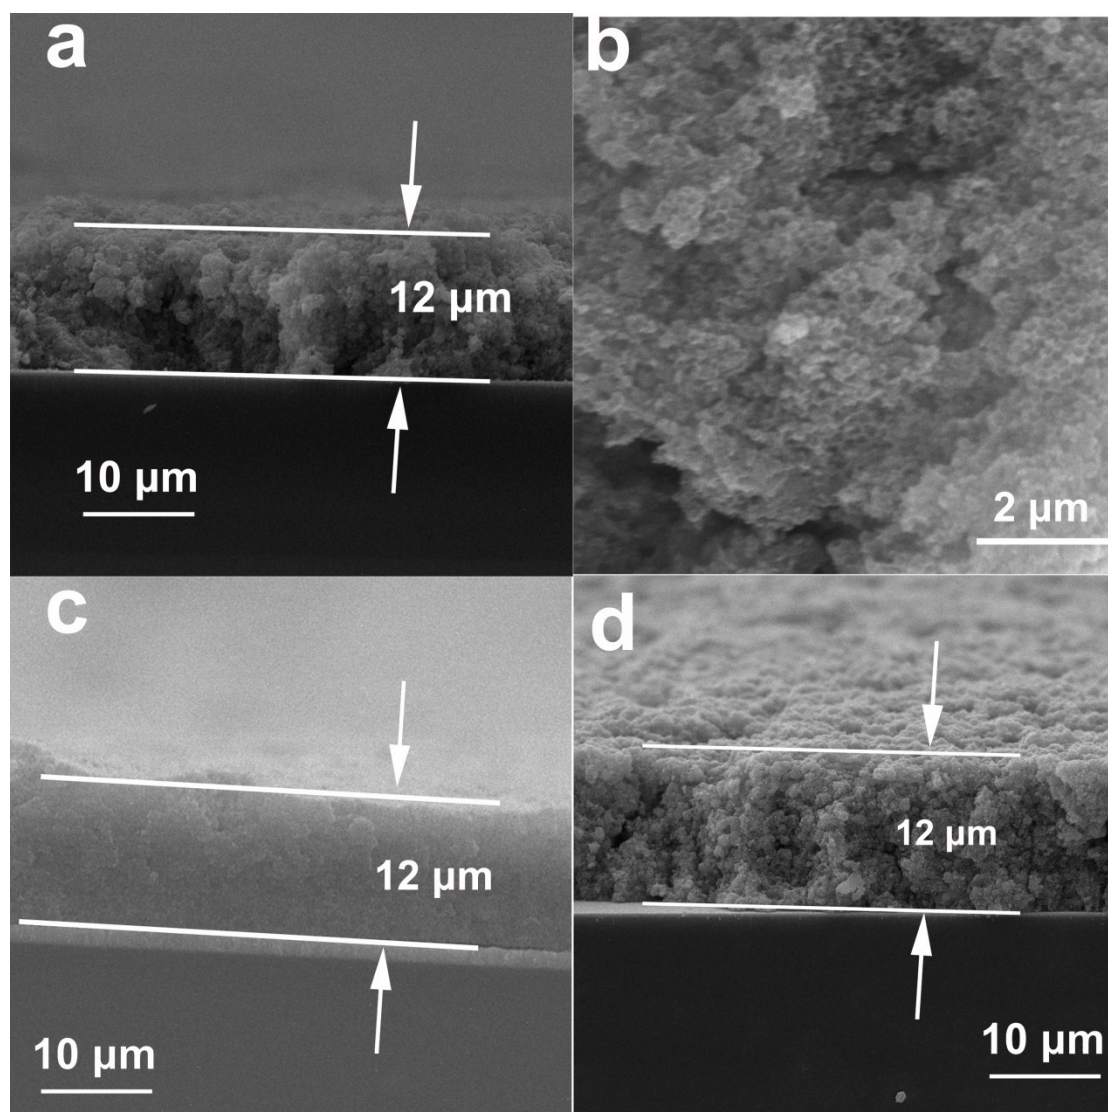

Figure S1. SEM images of the Hier-TiO<sub>2</sub> (a, b), Mes-TiO<sub>2</sub> (c), and Mac-TiO<sub>2</sub> (d)

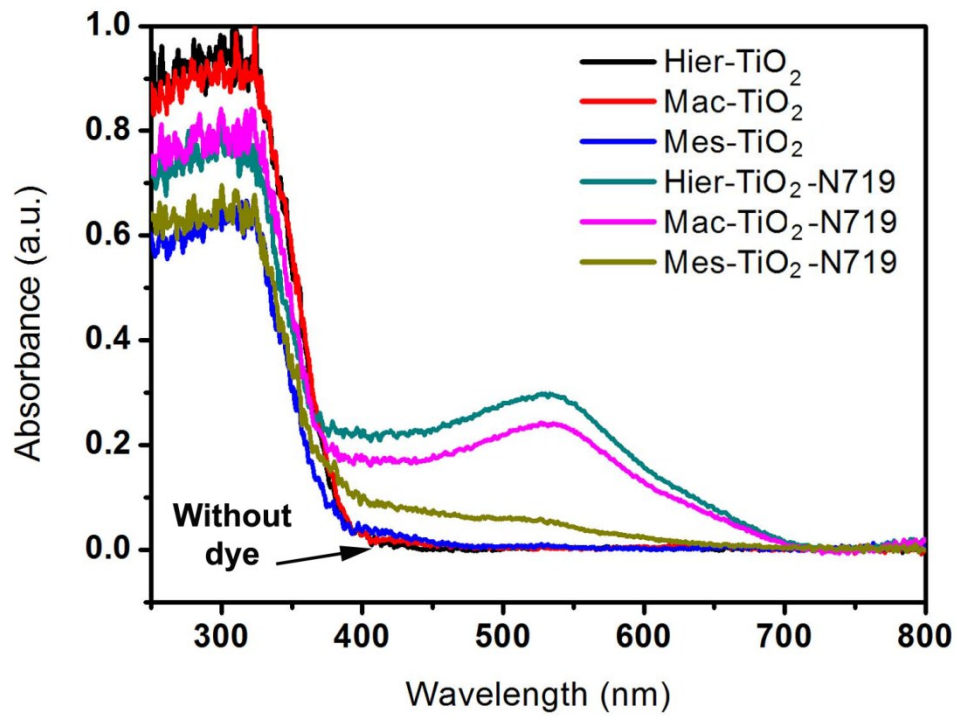

Figure S2. UV-DRS spectra of the photoanodes with and without dye loading.
